# Supplementary material for: Genome-wide scans using archived neonatal dried blood spot samples
Source: PubMed Central journal article supplement (PMC2713266; doi:10.1186/1471-2164-10-297), 2009-07-04
Supplement: 1471-2164-10-297-S1.pdf [file 1471-2164-10-297-S1.pdf]

| ID - yr. <sup>1</sup>          | DNA kit <sup>2</sup> | Ext. <sup>3</sup> | Disk# <sup>4</sup> | DNAin <sup>5</sup> | GPIex 2                |                         |                     | GPIex 4                |                         |                     | REPLI-g                |                         |                     |             |
|--------------------------------|----------------------|-------------------|--------------------|--------------------|------------------------|-------------------------|---------------------|------------------------|-------------------------|---------------------|------------------------|-------------------------|---------------------|-------------|
|                                |                      |                   |                    |                    | Call-rate <sup>6</sup> | Conf.-rate <sup>7</sup> | WGAout <sup>8</sup> | Call-rate <sup>6</sup> | Conf.-rate <sup>7</sup> | WGAout <sup>8</sup> | Call-rate <sup>6</sup> | Conf.-rate <sup>7</sup> | WGAout <sup>8</sup> |             |
| 1 - 1982                       | QIA                  | Yes               | 1                  | 3.8                | 93.07                  | 0.072                   | 7.41                | 98.43                  | 0.025                   | 5.39                | 90.53                  | 0.947                   | 6.10                |             |
|                                |                      |                   | 3                  | 9.6                | 96.30                  | 0.027                   | 6.87                | 98.27                  | 0.025                   | 4.54                | 98.00                  | 0.073                   | 7.15                |             |
| 2 - 1982                       | QIA                  | Yes               | 1                  | 2.3                | 94.74                  | 0.080                   | 6.04                | 98.15                  | 0.029                   | 4.19                | 84.95                  | 4.365                   | 4.97                |             |
|                                |                      |                   | 3                  | 10.6               | 94.72                  | 0.090                   | 6.33                | 98.33                  | 0.025                   | 5.12                | 62.91                  | 8.517                   | 4.47                |             |
| 3 - 1992                       | QIA                  | Yes               | 1                  | 7.7                | 96.73                  | 0.066                   | 6.68                | 98.09                  | 0.038                   | 4.79                | 98.41                  | 0.042                   | 5.39                |             |
|                                |                      |                   | 3                  | 17.3               | 95.82                  | 0.033                   | 6.11                | 98.53                  | 0.025                   | 4.14                | 99.26                  | 0.018                   | 6.64                |             |
| 4 - 1985                       | QIA                  | No                | 1                  | 5.2                | 96.82                  | 0.044                   | 6.70                | 97.93                  | 0.033                   | 4.26                | 19.79                  | 7.626                   | 7.61                |             |
|                                |                      |                   | 3                  | 15.3               | 96.52                  | 0.029                   | 6.10                | 98.47                  | 0.027                   | 4.91                | 67.45                  | 14.456                  | 7.06                |             |
| 5 - 1989                       | QIA                  | No                | 1                  | 10.3               | 82.36                  | 0.537                   | 6.30                | 98.17                  | 0.023                   | 4.74                | 95.48                  | 0.139                   | 5.46                |             |
|                                |                      |                   | 3                  | 25.9               | 97.16                  | 0.023                   | 7.43                | 98.54                  | 0.021                   | 5.27                | 84.15                  | 8.696                   | 7.61                |             |
| 6 - 1983                       | QIA                  | No                | 1                  | 5.3                | 95.47                  | 0.037                   | 5.97                | 98.20                  | 0.026                   | 4.55                | 91.58                  | 0.860                   | 4.86                |             |
|                                |                      |                   | 3                  | 17.6               | 94.76                  | 0.059                   | 7.27                | 98.18                  | 0.026                   | 5.18                | 98.52                  | 0.078                   | 6.47                |             |
| 7 - 1983                       | ENA                  | Yes               | 1                  | 2.6                | 94.73                  | 0.035                   | 5.71                | 97.39                  | 0.028                   | 4.90                | 99.46                  | 0.020                   | 5.43                |             |
|                                |                      | No                |                    | 1.9                | 94.73                  | 0.039                   | 5.85                | 96.51                  | 0.048                   | 4.34                | 99.30                  | 0.030                   | 2.77                |             |
| 8 - 1984                       | ENA                  | Yes               | 1                  | 2.7                | 96.39                  | 0.040                   | 7.23                | 97.34                  | 0.049                   | 4.65                | 99.51                  | 0.031                   | 5.82                |             |
|                                |                      | No                |                    | 3.9                | 94.39                  | 0.042                   | 6.15                | 96.78                  | 0.044                   | 3.52                | 99.30                  | 0.028                   | 2.57                |             |
|                                |                      |                   |                    | <i>Median</i>      | <i>6.5</i>             | <i>95.12</i>            | <i>0.041</i>        | <i>6.31</i>            | <i>98.18</i>            | <i>0.027</i>        | <i>4.70</i>            | <i>96.74</i>            | <i>0.109</i>        | <i>5.64</i> |
|                                |                      |                   |                    | <i>Std. Dev.</i>   | <i>7.0</i>             | <i>3.47</i>             | <i>0.124</i>        | <i>0.58</i>            | <i>0.62</i>             | <i>0.009</i>        | <i>0.49</i>            | <i>21.21</i>            | <i>4.503</i>        | <i>1.51</i> |
| <i>Correlation coefficient</i> |                      |                   |                    |                    | <i>-0.9613</i>         |                         |                     | <i>-0.8464</i>         |                         |                     | <i>-0.7066</i>         |                         |                     |             |

**Table 1: Performance of different wgaDNA preparations.** <sup>1</sup>Year the DBSS was stored. <sup>2</sup>Kit used for DNA-extraction, QIA- QIAamp DNA Blood Micro Kit; ENA- Extract-N-Amp Blood PCR Kit. <sup>3</sup>Extraction of proteins from DBSS prior to extraction of DNA. <sup>4</sup>Number of 3.2mm disks used. <sup>5</sup>DNA (ng) utilized per WGA reaction. <sup>6</sup>GWS genotypes call-rate (percent). <sup>7</sup>Rate of conflicts (percent) between genotype results on wgaDNA and reference gDNA. <sup>8</sup>wgaDNA ( $\mu\text{g}$ ) produced per reaction.
